# Supplementary material for: 高血圧自然発症ラット(SHR)血管平滑筋細胞の増殖・収縮反応におけるNa^+, K^+細胞膜透過の意義 : 口述発表 : 第57回日本循環器学会学術集会
Source: Springer Nature journal article supplement (doi:10.1186/s13195-021-00860-1), 1993-03-01
Supplement: MOESM1 [file 13195_2021_860_MOESM1_ESM.pdf]

**A $\eta$ - $\alpha$  and A $\eta$ - $\beta$  peptides impair LTP *ex vivo* within the low nanomolar range and impact neuronal activity *in vivo*.**

Maria Mensch et al.

SUPPLEMENTARY MATERIAL

Supplementary Figure S1.  
Supplementary Tables S1-5.

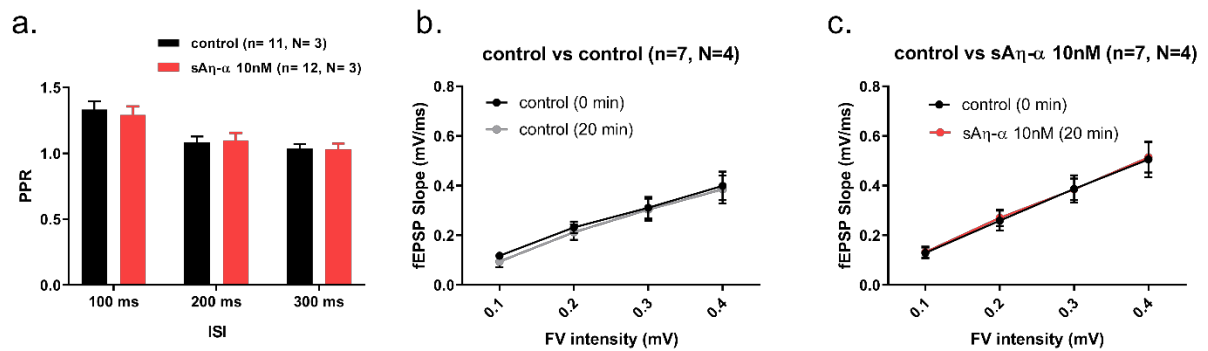

**Supplementary Figure S1. Acute application of sAη-α (10nM) does not perturb short-term pre-synaptic plasticity nor basal excitatory synaptic transmission.**

**a)** PPRs (fEPSP2 slope/fEPSP1 slope) were similar at all ISIs examined (100ms, 200ms, 300ms) in control condition (aCSF only) and in presence of 10nM sAη-α throughout recording. ISI: inter-stimulus interval.

**b)** Synapse input–output curves (fEPSP slopes versus increasing afferent FV amplitudes) were similar at time 0 and then after 20 minutes in control condition (aCSF only).

**c)** Synapse input–output curves (fEPSP slopes versus increasing afferent FV amplitudes) were similar at time 0 in control condition (aCSF only) and then after 20 minutes of incubation with sAη-α (10nM).

(n=slices, N=mice). Detailed statistics are shown in Supplementary Table S1.

**Table S1 - Statistics of Figure 1 and S1 and C57Bl/6 ex vivo LTP data**

| Mouse model and genetic background | Experiment                                               | # mice                            | # slice | Measurement          | Treatment            | Average     | S.E.M.               | Units                            | Statistical Test                 | p value           | F/t/z/R ETC value                                           | Comparison                                                                               | post-hoc test  | p value                          | q(DF) value    | Figure                                                      |            |                                                                  |         |                                  |          |               |            |
|------------------------------------|----------------------------------------------------------|-----------------------------------|---------|----------------------|----------------------|-------------|----------------------|----------------------------------|----------------------------------|-------------------|-------------------------------------------------------------|------------------------------------------------------------------------------------------|----------------|----------------------------------|----------------|-------------------------------------------------------------|------------|------------------------------------------------------------------|---------|----------------------------------|----------|---------------|------------|
| RjOri:SWISS                        | LTP - 100 nM sA $\eta$ - $\beta$                         | 5                                 | 13      | last 15 minutes      | -                    | 148,50      | 5,33                 | %                                | Student t-test                   | <b>p=0,0003</b>   | t=4,406 df=20                                               | -                                                                                        | -              | -                                | -              | <b>1b</b>                                                   |            |                                                                  |         |                                  |          |               |            |
|                                    |                                                          | 3                                 | 9       |                      | sA $\eta$ - $\beta$  | 115,10      | 4,79                 | %                                |                                  |                   |                                                             |                                                                                          |                |                                  |                |                                                             |            |                                                                  |         |                                  |          |               |            |
|                                    | LTP - 10 nM sA $\eta$ - $\alpha$ and sA $\eta$ - $\beta$ | 10                                | 17      | last 15 minutes      | -                    | 168,40      | 5,77                 | %                                | One-way ANOVA                    | <b>p=0,0039</b>   | F(2,31)=6,670                                               | control vs sA $\eta$ - $\alpha$                                                          | Dunnett's test | <b>0,0061</b>                    | q(31)=3,203    | <b>1d</b>                                                   |            |                                                                  |         |                                  |          |               |            |
|                                    |                                                          | 5                                 | 8       |                      | sA $\eta$ - $\alpha$ | 138,30      | 7,87                 | %                                |                                  |                   |                                                             | control vs sA $\eta$ - $\beta$                                                           |                | <b>0,0205</b>                    | q(31)=2,721    |                                                             |            |                                                                  |         |                                  |          |               |            |
|                                    |                                                          | 3                                 | 9       |                      | sA $\eta$ - $\beta$  | 143,80      | 5,66                 | %                                |                                  |                   |                                                             |                                                                                          |                |                                  |                |                                                             |            |                                                                  |         |                                  |          |               |            |
|                                    | LTP - 5 nM sA $\eta$ - $\alpha$ and sAPP- $\beta$        | 3                                 | 7       | last 15 minutes      | -                    | 145,10      | 3,45                 | %                                | One-way ANOVA                    | <b>p=0,0072</b>   | F(2,15)=6,987                                               | control vs sA $\eta$ - $\alpha$                                                          | Dunnett's test | <b>0,0074</b>                    | q(15)=3,412    | <b>1f</b>                                                   |            |                                                                  |         |                                  |          |               |            |
|                                    |                                                          | 3                                 | 7       |                      | sA $\eta$ - $\alpha$ | 124,50      | 4,23                 | %                                |                                  |                   |                                                             | control vs sA $\eta$ - $\beta$                                                           |                | <b>0,0235</b>                    | q(15)=2,836    |                                                             |            |                                                                  |         |                                  |          |               |            |
|                                    |                                                          | 3                                 | 4       |                      | sA $\eta$ - $\beta$  | 125,00      | 7,40                 | %                                |                                  |                   |                                                             |                                                                                          |                |                                  |                |                                                             |            |                                                                  |         |                                  |          |               |            |
|                                    | LTP - 1 nM sA $\eta$ - $\alpha$ and sAPP- $\beta$        | 6                                 | 12      | last 15 minutes      | -                    | 142,30      | 4,24                 | %                                | One-way ANOVA                    | p=0,2006          | f(2,32)=1,657                                               | control vs sA $\eta$ - $\alpha$                                                          | Dunnett's test | 0,2935                           | q(32)=1,389    | <b>1h</b>                                                   |            |                                                                  |         |                                  |          |               |            |
|                                    |                                                          | 6                                 | 12      |                      | sA $\eta$ - $\alpha$ | 132,60      | 5,11                 | %                                |                                  |                   |                                                             | control vs sA $\eta$ - $\beta$                                                           |                | 0,171                            | q(32)=1,706    |                                                             |            |                                                                  |         |                                  |          |               |            |
|                                    |                                                          | 6                                 | 11      |                      | sA $\eta$ - $\beta$  | 130,10      | 5,66                 | %                                |                                  |                   |                                                             |                                                                                          |                |                                  |                |                                                             |            |                                                                  |         |                                  |          |               |            |
|                                    | C57Bl/6                                                  | LTP - 100 nM sA $\eta$ - $\alpha$ | 5       | 17                   | last 15 minutes      | -           | 158,00               | 6,84                             | %                                | Mann Whitney Test | <b>p=0,0109</b>                                             | U=25                                                                                     | -              | -                                | -              | -                                                           | -          |                                                                  |         |                                  |          |               |            |
| 2                                  | 8                                                        | sA $\eta$ - $\alpha$              | 125,90  | 8,28                 |                      | %           |                      |                                  |                                  |                   |                                                             |                                                                                          |                |                                  |                |                                                             |            |                                                                  |         |                                  |          |               |            |
| RjOri:SWISS                        | PPR 10nM sA $\eta$ - $\alpha$                            | 100 ms                            | 3       | 11                   | EPSP slope           | -           | 1,33                 | 0,06                             | %                                | Two-way ANOVA     | interaction p=0,8842<br>time p<0,0001<br>treatment p=0,7824 | interaction F (2, 63) = 0,1233<br>time F (2, 63) = 15,53<br>treatment F (1, 63) = 0,0769 | Sidak's        | Control vs sA $\eta$ - $\alpha$  | p=0,9908       | t(84) = 0,3998                                              | <b>S1a</b> |                                                                  |         |                                  |          |               |            |
| 3                                  |                                                          |                                   | 12      | sA $\eta$ - $\alpha$ |                      | 1,29        | 0,06                 | %                                | Control vs sA $\eta$ - $\alpha$  |                   |                                                             |                                                                                          |                | p=0,9999                         | t(84) = 0,1266 |                                                             |            |                                                                  |         |                                  |          |               |            |
| 200 ms                             |                                                          | 3                                 | 11      | -                    |                      | 1,09        | 0,04                 | %                                | Control vs sA $\eta$ - $\alpha$  |                   |                                                             |                                                                                          |                | p>0,9999                         | t(84)= 0,08895 |                                                             |            |                                                                  |         |                                  |          |               |            |
|                                    |                                                          | 3                                 | 12      | sA $\eta$ - $\alpha$ |                      | 1,10        | 0,06                 | %                                |                                  |                   |                                                             |                                                                                          |                |                                  |                |                                                             |            |                                                                  |         |                                  |          |               |            |
| 300 ms                             |                                                          | 3                                 | 11      | -                    |                      | 1,04        | 0,03                 | %                                | Control vs sA $\eta$ - $\alpha$  |                   |                                                             |                                                                                          |                | p>0,9999                         | t(84)= 0,08895 |                                                             |            |                                                                  |         |                                  |          |               |            |
|                                    |                                                          | 3                                 | 12      | sA $\eta$ - $\alpha$ |                      | 1,03        | 0,05                 | %                                |                                  |                   |                                                             |                                                                                          |                |                                  |                |                                                             |            |                                                                  |         |                                  |          |               |            |
| RjOri:SWISS                        | I/O                                                      | 0.1 mV                            | 4       | 7                    | EPSP slope           | -           | 0,117634262          | 0,0140231                        | %                                | Two-way ANOVA     | interaction p=0,9974<br>time p<0,0001<br>retesting p=0,5680 | F (3, 48) = 0,01519<br>F (3, 48) = 19,02<br>F (1, 48) = 0,3306                           | Sidak's        | Control vs.Control               | p=0,9896       | t(48)=0,4139                                                | <b>S1b</b> |                                                                  |         |                                  |          |               |            |
|                                    |                                                          |                                   | 4       | 7                    |                      | -           | 0,09444753           | 0,0225927                        | %                                |                   |                                                             |                                                                                          |                | Control vs.Control               | p=0,9945       | t(48)=0,3496                                                |            |                                                                  |         |                                  |          |               |            |
|                                    |                                                          | 0.2 mV                            | 4       | 7                    |                      | -           | 0,231957891          | 0,023384                         | %                                |                   |                                                             |                                                                                          |                | Control vs.Control               | p=0,9999       | t(48)=0,1302                                                |            |                                                                  |         |                                  |          |               |            |
|                                    |                                                          |                                   | 4       | 7                    |                      | -           | 0,212371057          | 0,0309529                        | %                                |                   |                                                             |                                                                                          |                | Control vs.Control               | p=0,9984       | t(48)=0,2562                                                |            |                                                                  |         |                                  |          |               |            |
|                                    |                                                          | 0.3 mV                            | 4       | 7                    |                      | -           | 0,311017213          | 0,0435328                        | %                                |                   |                                                             |                                                                                          |                | Control vs.Control               | p>0,9999       | t(48)=0,05298                                               |            |                                                                  |         |                                  |          |               |            |
|                                    |                                                          |                                   | 4       | 7                    |                      | -           | 0,303724585          | 0,0443224                        | %                                |                   |                                                             |                                                                                          |                | Control vs. sA $\eta$ - $\alpha$ | p=0,9997       | t(56)=0,1717                                                |            |                                                                  |         |                                  |          |               |            |
|                                    |                                                          | 0.4 mV                            | 4       | 7                    |                      | -           | 0,399198355          | 0,057836                         | %                                |                   |                                                             |                                                                                          |                | Control vs. sA $\eta$ - $\alpha$ | p>0,9999       | t(56)=0,02858                                               |            |                                                                  |         |                                  |          |               |            |
|                                    |                                                          |                                   | 4       | 7                    |                      | -           | 0,384845293          | 0,0559999                        | %                                |                   |                                                             |                                                                                          |                | Control vs. sA $\eta$ - $\alpha$ | p>0,9999       | t(56)=0,1183                                                |            |                                                                  |         |                                  |          |               |            |
|                                    |                                                          | I/O 10nM sA $\eta$ - $\alpha$     | 0.1 mV  | 3                    |                      | 8           | -                    | 0,129088906                      | 0,0221622                        |                   |                                                             |                                                                                          |                | %                                | Two-way ANOVA  | interaction p=0,9991<br>time p<0,0001<br>treatment p=0,8757 |            | F (3, 56) = 0,007462<br>F (3, 56) = 24,28<br>F (1, 56) = 0,02471 | Sidak's | Control vs. sA $\eta$ - $\alpha$ | p>0,9999 | t(56)=0,05298 | <b>S1c</b> |
|                                    |                                                          |                                   |         | 3                    |                      | 8           | sA $\eta$ - $\alpha$ | 0,132580932                      | 0,0222377                        |                   |                                                             |                                                                                          |                | %                                |                |                                                             |            |                                                                  |         | Control vs. sA $\eta$ - $\alpha$ | p=0,9997 | t(56)=0,1717  |            |
|                                    |                                                          |                                   | 0.2 mV  | 3                    |                      | 8           | -                    | 0,259067485                      | 0,0403819                        |                   |                                                             |                                                                                          |                | %                                |                |                                                             |            |                                                                  |         | Control vs. sA $\eta$ - $\alpha$ | p>0,9999 | t(56)=0,02858 |            |
|                                    |                                                          |                                   |         | 3                    |                      | 8           | sA $\eta$ - $\alpha$ | 0,270384224                      | 0,0329775                        |                   |                                                             |                                                                                          |                | %                                |                |                                                             |            |                                                                  |         | Control vs. sA $\eta$ - $\alpha$ | p>0,9999 | t(56)=0,1183  |            |
|                                    | 0.3 mV                                                   |                                   | 3       | 8                    | -                    | 0,386970615 | 0,0543952            | %                                | Control vs. sA $\eta$ - $\alpha$ | p>0,9999          | t(56)=0,1183                                                |                                                                                          |                |                                  |                |                                                             |            |                                                                  |         |                                  |          |               |            |
|                                    |                                                          |                                   | 3       | 8                    | sA $\eta$ - $\alpha$ | 0,385086387 | 0,0433801            | %                                |                                  |                   |                                                             |                                                                                          |                |                                  |                |                                                             |            |                                                                  |         |                                  |          |               |            |
|                                    | 0.4 mV                                                   | 3                                 | 8       | -                    | 0,505709119          | 0,0714783   | %                    | Control vs. sA $\eta$ - $\alpha$ | p>0,9999                         | t(56)=0,1183      |                                                             |                                                                                          |                |                                  |                |                                                             |            |                                                                  |         |                                  |          |               |            |
|                                    |                                                          | 3                                 | 8       | sA $\eta$ - $\alpha$ | 0,513507936          | 0,0610509   | %                    |                                  |                                  |                   |                                                             |                                                                                          |                |                                  |                |                                                             |            |                                                                  |         |                                  |          |               |            |

**Table S2 - Statistics of Figure 2**

| Mouse model and genetic background | Experiment                                             | # mice | # slice | Measurement     | Treatment              | Average | S.E.M. | Units | Statistical Test | p value  | F/t/z/R ETC value | Comparison                        | post-hoc test  | p value | q(DF) value | Figure |
|------------------------------------|--------------------------------------------------------|--------|---------|-----------------|------------------------|---------|--------|-------|------------------|----------|-------------------|-----------------------------------|----------------|---------|-------------|--------|
| RjOrl:SWISS                        | LTP - recA $\eta$ - $\alpha$ and recA $\eta$ - $\beta$ | 5      | 8       | last 15 minutes | -                      | 137,70  | 7,50   | %     | One-Way ANOVA    | p=0,0106 | F(2,18)=0,4396    | control vs recA $\eta$ - $\alpha$ | Dunnett's test | 0,0104  | q(18)=3,155 | 2d     |
|                                    |                                                        | 2      | 6       |                 | recA $\eta$ - $\alpha$ | 99,04   | 6,58   | %     |                  |          |                   | control vs recA $\eta$ - $\beta$  |                | 0,0311  | q(18)=2,639 |        |
|                                    |                                                        | 3      | 7       |                 | recA $\eta$ - $\beta$  | 106,70  | 10,71  | %     |                  |          |                   |                                   |                |         |             |        |

**Table S3 - Statistics of Figure 3**

| Mouse model and genetic background | Experiment                                             | # mice | # slice | Measurement     | Treatment               | Average | S.E.M. | Units | Statistical Test | p value  | F/t/z/R ETC value | Comparison                         | post-hoc test  | p value | q(DF) value | Figure |
|------------------------------------|--------------------------------------------------------|--------|---------|-----------------|-------------------------|---------|--------|-------|------------------|----------|-------------------|------------------------------------|----------------|---------|-------------|--------|
| RjOri: SWISS                       | LTP - 100 nM sA $\eta$ -NT and sA $\eta$ - $\beta$ -CT | 8      | 11      | last 15 minutes | -                       | 127,30  | 8,03   | %     | One_Way ANOVA    | p=0,0288 | f(2,22)=1,093     | control vs sA $\eta$ - $\beta$ -CT | Dunnett's test | 0,9955  | q(22)=0,081 | 3c     |
|                                    |                                                        | 3      | 6       |                 | sA $\eta$ - $\beta$ -CT | 139,20  | 5,03   | %     |                  |          |                   | control vs sA $\eta$ -NT           |                | 0,0285  | q(22)=2,638 |        |
|                                    |                                                        | 3      | 8       |                 | sA $\eta$ -NT           | 100,00  | 7,42   | %     |                  |          |                   |                                    |                |         |             |        |
|                                    | LTP - 10nM sA $\eta$ -NT                               | 4      | 8       | last 15 minutes | -                       | 138,10  | 2,79   | %     | Unpaired t test  | p=0,0051 | t=3,363; df=13    | -                                  | -              | -       | -           | 3e     |
|                                    |                                                        | 3      | 7       |                 | sA $\eta$ -NT           | 124,00  | 3,18   | %     |                  |          |                   |                                    |                |         |             |        |

Table S4 – Statistics of Figure 4

**Figure 4A-C**

**Mann Whitney U-Test**

|                                     | <b>Baseline</b> | <b>Wash-In</b> | <b>p-value</b> |
|-------------------------------------|-----------------|----------------|----------------|
| <b>Aeta-Beta-CT<br/>(Figure 4A)</b> | 12 [8.5, 17.5]  | 14 [9.5, 17.5] | 0.2            |
| <b>Aeta-Alpha<br/>(Figure 4B)</b>   | 18 [11.1, 21.5] | 5 [1.3, 11.3]  | 1.1e-23        |
| <b>Aeta-Beta<br/>(Figure 4C)</b>    | 13 [9.5, 18.5]  | 1.8 [0.5, 4]   | 2e-33          |

*Values as Median [25th percentile, 75th percentile]*

**Figure 4D**

**Descriptives**

|                     | <b>Change from Baseline</b> |
|---------------------|-----------------------------|
| <b>Aeta-Beta-CT</b> | 0.5 [-3, 4.5]               |
| <b>Aeta-Alpha</b>   | -9.3 [-14, -3.7]            |
| <b>Aeta-Beta</b>    | -10.5 [-15, -6]             |

*Values as Median [25th percentile, 75th percentile]*

**Kruskal-Wallis ANOVA Table**

| 'Source' | 'SS'       | 'df' | 'MS'      | 'Chi-sq' | 'Prob>Chi-sq' |
|----------|------------|------|-----------|----------|---------------|
| 'Groups' | 4609047.1  | 2    | 2304523.6 | 198.8    | 6.7e-44       |
| 'Error'  | 7584742.4  | 524  | 14474.69  |          |               |
| 'Total'  | 12193789.5 | 526  |           |          |               |

**Pairwise results from multiple comparison test (with Tukey-Kramer correction)**

| <b>Group A</b> | <b>Group B</b> | <b>Lower (95%)<br/>Confidence<br/>Interval</b> | <b>Estimate</b> | <b>Upper (95%)<br/>Confidence<br/>Interval</b> | <b>p-value</b> |
|----------------|----------------|------------------------------------------------|-----------------|------------------------------------------------|----------------|
| Aeta-Beta-CT   | Aeta-Alpha     | 140.9                                          | 178.1           | 215.3                                          | 9.6e-10        |
| Aeta-Beta-CT   | Aeta-Beta      | 164.3                                          | 202.2           | 240.2                                          | 9.6e-10        |
| Aeta-Alpha     | Aeta-Beta      | -16.1                                          | 24.1            | 64.3                                           | 0.3            |

**Table S5 - Statistics of Figure 5**

| Rat model      | Experiment  | # rats | Measurement      | Treatment        | Average | S.E.M. | Units | Statistical Test | p value | F/t/z/R ETC value | Figure |
|----------------|-------------|--------|------------------|------------------|---------|--------|-------|------------------|---------|-------------------|--------|
| Sprague-Dawley | In vivo LTP | 9      | first 10 minutes | sAn- $\alpha$    | 159,20  | 8,00   | %     | Student t-test   | p=0,013 | t=2,915 df=14     | 5b     |
|                |             | 7      | first 10 minutes | sAn- $\beta$ -CT | 192,20  | 5,34   | %     |                  |         |                   |        |
| Sprague-Dawley | In vivo LTP | 9      | last 10 minutes  | sAn- $\alpha$    | 166,00  | 10,60  | %     | Student t-test   | p=0,024 | t=2,530 df=14     | 5c     |
|                |             | 7      | last 10 minutes  | sAn- $\beta$ -CT | 212,00  | 15,50  | %     |                  |         |                   |        |
